# Supplementary material for: A Comprehensive tRNA Deletion Library Unravels the Genetic Architecture of the tRNA Pool
Source: PubMed Central journal article supplement (PMC3894157; doi:10.1371/journal.pgen.1004084), 2014-01-16

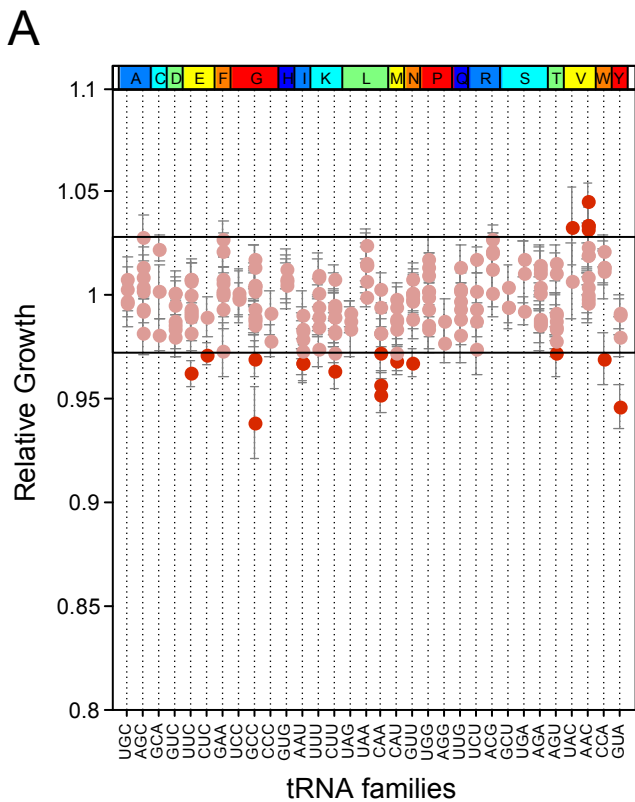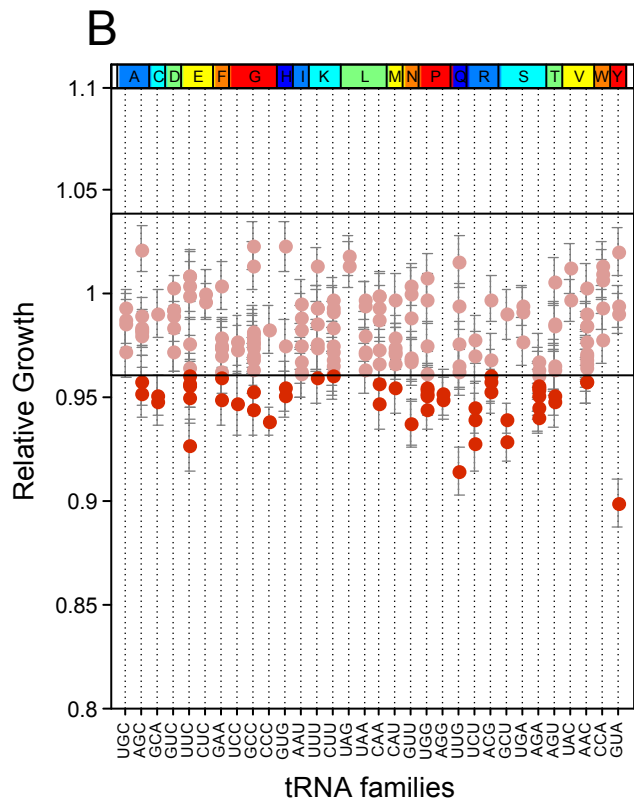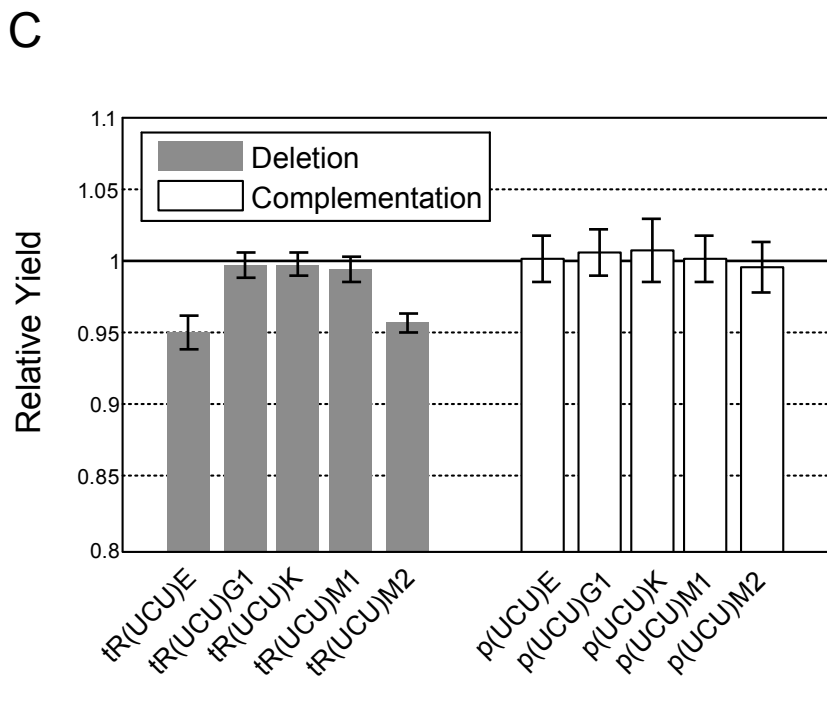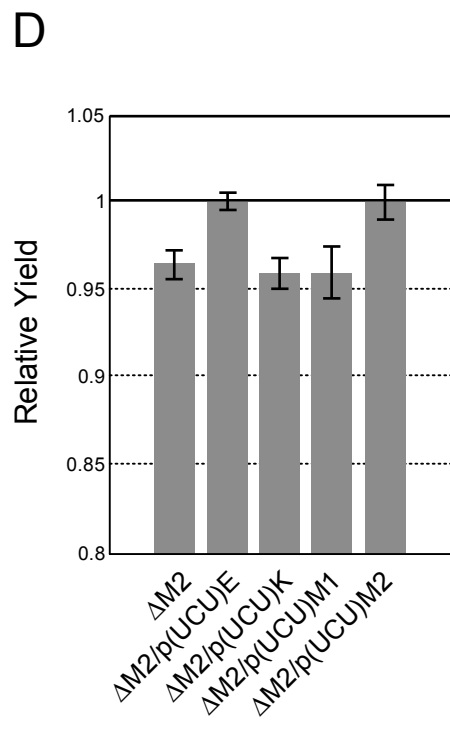

Supplement: pgen.1004084.s007.pdf [file pgen.1004084.s007.pdf]
