# Supplementary material for: A Comprehensive tRNA Deletion Library Unravels the Genetic Architecture of the tRNA Pool
Source: PLoS Genet. 2014 Jan 16;10(1):e1004084. doi: 10.1371/journal.pgen.1004084 (PMC3894157; doi:10.1371/journal.pgen.1004084)
Supplement: Table S6 — List of primers used for RT-qPCR experiments. (XLSX) [file pgen.1004084.s015.xlsx]

## Sheet: Sheet1
Table S6-Primers for RT-qPCR
RPB9		ATGTAGAAGAAGCGGGCAGT
RPB9		GAAGAGTGGGATCGGAACCA
RPB2		GATGGTCTAATTGCGCCTGG
RPB2		GGTGTGGAAGCATCACGTTT
RPB3		TGTCTAATCTCATGGGCCGT
RPB3		GGCGTGCTCTTTGGCTATAC
RPC82		CTCCGTCACAGCTCAAGTTT
RPC82		TCTCCTCAACAAGTTCGGCT
RPC25		GAATCCCGCCCGATCAATTC
RPC25		GCTTCAATTGGCCTTCCTCG
RPC11		ATGTTCTTGGTGGTGGTTGG
RPC11		AGGTAGTCATCGGCTCATCAG
RPC40		TGCTGATTGTCCGGTTGTTC
RPC40		GCGGTGGAAACTGGTGAAAA
RPC34		TGGGAATCGGGTCGTTAACA
RPC34		CCGACATGGTGGCTTTCTTT
RPC19		ACTGGCGATGAAGAACAGGA
RPC19		GCGTGTGATCCTCCTCTACA
PRE10		TCAGCAAGAGAGGCCGTTAA
PRE10		GCCCTTAACGAACTTGTGCA
UMP1		CTTTCATCTGCAGTGCCCTC
UMP1		ATTTGTCTTTGGCGCTGTGT
PRE1		GCGTCTTCTAAGGCAGTCAC
PRE1		TGTACTCGGCGAATTGAACG
RPN11		AGCATGGTAGAGCTGGTGTT
RPN11		CAGCCTCAACAGAAACTCCG
RPT1		CAAAGAAAAGGCCGGTGTGA
RPT1		AACGAGCGACTTGTAAGGGA
RPN12		TCGTACCAGAAAGCATGGGA
RPN12		TGGAGAGAGGGAGAAAGTCG
RPS6B		GCTTTGAAGGTCAGAAACGC
RPS6B		CGGCCTTTTCAGCCTTTCTT
tL(UGA)		CGAGTGGTTTAAGGCGTCAG
tL(UGA)		GGATTCGAACCCTTGCATCC
tS(UGA)		CTATGGCCGAGTGGTTAAGG
tS(UGA)		ACACCAGCAGGATTTGAACC
tG(UCC)		TTATCATCCCACCCTTCCAA
tG(UCC)		TGAGCGGTACGAGAATCGAA
